# Supplementary material
Source: MDPI journal article supplement (https://www.mdpi.com/2077-1312/9/9/1039)
Supplement: s1 [file s1 › jmse-1362509-supplementary.pdf]

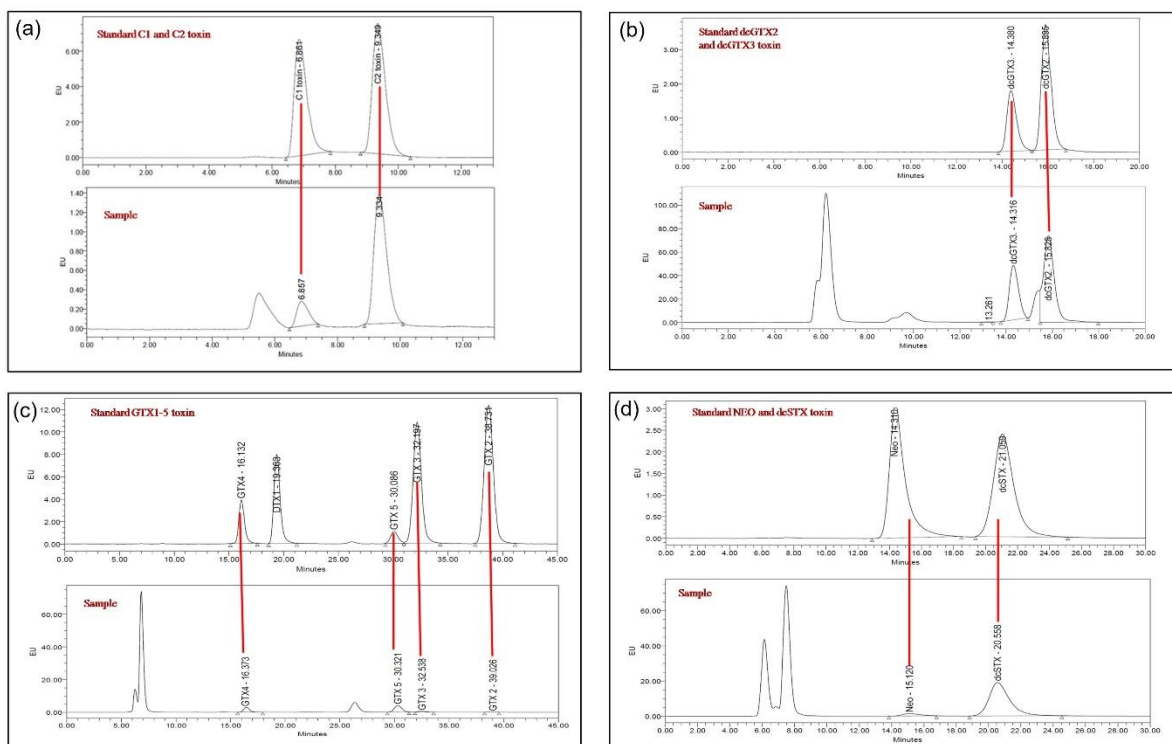

Figure S1: Paralytic Shellfish Toxin (PST) derivatives (a) C1 and C2, (b) dcGTx2 and dcGTx3, (c) GTX 1-5 and (d) NEO and dcSTX of the standard and algal sample using post-column oxidation reaction. The amount of each toxin derivative was quantified based on the respectively standard curve.
